# Supplementary material
Source: MDPI journal article supplement (https://www.mdpi.com/2073-4441/15/13/2332)
Supplement: s1 [file s1]

## Supplementary Material

### Differences of nitrogen transformation pathways and their functional microorganisms in water and sediment of a seasonally frozen lake, China

Zhiqiang Tian, Sheng Zhang, Junping Lu, Xiaohong Shi, Shengnan Zhao, Biao Sun, Yanjun Wang, Guohua Li, Zhimou Cui, Xueru Pan, Guoguang Li, Zixuan Zhang

#### Correspondence:

Sheng Zhang: shengzhang@imau.edu.cn, Junping Lu: lujunping2008@iamu.edu.cn

**Table S1** Statistics of metagenomic sequencing data

| Sample group     | Sample ID | Raw reads | Raw base (bp) | Clean reads | Clean base (bp) | Percentage of clean reads in raw reads | Contigs | ORFs     |
|------------------|-----------|-----------|---------------|-------------|-----------------|----------------------------------------|---------|----------|
| Surface water    | WL1_W1    | 88463084  | 13357925684   | 86603048    | 12977682257     | 97.90                                  | 1109064 | 1434043  |
|                  | WL2_W1    | 78632274  | 11873473374   | 73494128    | 10973832097     | 93.47                                  | 859268  | 844909   |
|                  | WL3_W1    | 80743274  | 12192234374   | 78537414    | 11742672972     | 97.27                                  | 887651  | 1083819  |
|                  | Average   | 82612877  | 12474544477   | 79544863    | 11898062442     | 96.21                                  | 951994  | 1120924  |
| Bottom water     | WL1_W2    | 77172888  | 11653106088   | 75122898    | 11302234577     | 97.34                                  | 853962  | 1253041  |
|                  | WL2_W2    | 84972124  | 12830790724   | 83049544    | 12447104975     | 97.74                                  | 893387  | 989632   |
|                  | WL3_W2    | 86767602  | 13101907902   | 83479316    | 12520177824     | 96.21                                  | 892756  | 1054616  |
|                  | Average   | 82970871  | 12528601571   | 80550586    | 12089839125     | 97.10                                  | 880035  | 1099096  |
| Surface sediment | WL1_S1    | 87604762  | 13228319062   | 85530096    | 12899367686     | 97.63                                  | 891803  | 1094650  |
|                  | WL2_S1    | 92124520  | 13910802520   | 90236080    | 13596231557     | 97.95                                  | 1047678 | 1350735  |
|                  | WL3_S1    | 89074522  | 13450252822   | 87145064    | 13138500504     | 97.83                                  | 1169215 | 1568126  |
|                  | Average   | 89601268  | 13529791468   | 87637080    | 13211366582     | 97.80                                  | 1036232 | 1337837  |
| Total            |           | 765555050 | 115598812550  | 743197588   | 111597804449    | 97.08                                  | 8604784 | 10673571 |

**Table S2** Physical and chemical properties of water samples

| Sample group  | TN (mg/L)      | NH <sub>4</sub> <sup>+</sup> -N (mg/L) | NO <sub>3</sub> <sup>-</sup> -N (mg/L) | NO <sub>2</sub> <sup>-</sup> -N (mg/L) | DIN (mg/L)     | TON (mg/L)     | TOC (mg/L)      | C/N             | WT (°C)       | pH             | DO (mg/L)      | ORP (mV)         |
|---------------|----------------|----------------------------------------|----------------------------------------|----------------------------------------|----------------|----------------|-----------------|-----------------|---------------|----------------|----------------|------------------|
| Surface water | 2.27<br>±1.48a | 0.82<br>±0.29a                         | 0.90<br>±0.90a                         | 0.03<br>±0.02a                         | 1.75<br>±1.22a | 0.52<br>±0.26a | 14.87<br>±1.57a | 12.66<br>±4.87a | 1.7<br>±0.15b | 8.24<br>±0.03a | 9.10<br>±0.21a | -88.3<br>±17.13a |
| Bottom water  | 2.84<br>±1.55a | 1.09<br>±0.29a                         | 1.09<br>±1.09a                         | 0.04<br>±0.02a                         | 2.22<br>±1.27a | 0.62<br>±0.30a | 16.53<br>±1.33a | 9.84<br>±4.29a  | 5.0<br>±1.84a | 8.14<br>±0.07a | 5.50<br>±1.60b | -71.0<br>±24.29a |

Note: Values are the means  $\pm$  standard error (SE; n = 3). The same letter in the same column indicates no significant difference, and different letter indicates a statistically significant difference at  $P \leq 0.05$ . TN, total nitrogen;  $\text{NH}_4^+\text{-N}$ , ammonium;  $\text{NO}_3^-\text{-N}$ , nitrate;  $\text{NO}_2^-\text{-N}$ , nitrite; DIN, dissolved inorganic nitrogen; TON, total organic nitrogen; TOC, total organic carbon; C/N, ratio of total organic carbon to total nitrogen; WT, water temperature; DO, dissolved oxygen; and ORP, oxidation-reduction potential.

**Table S3** Physical and chemical properties of sediment samples

| Sample group | TN<br>(g/kg) | $\text{NH}_4^+\text{-N}$<br>(mg/kg) | $\text{NO}_3^-\text{-N}$<br>(mg/kg) | $\text{NO}_2^-\text{-N}$<br>(mg/kg) | DIN<br>(mg/kg) | DON<br>(mg/kg) | TOC<br>(g/kg) | C/N        |
|--------------|--------------|-------------------------------------|-------------------------------------|-------------------------------------|----------------|----------------|---------------|------------|
| Surface      | 1.68         | 40.29                               | 6.67                                | 0.13                                | 47.09          | 125.17         | 31.25         | 19.21      |
| sediment     | $\pm 0.20$   | $\pm 3.32$                          | $\pm 1.17$                          | $\pm 0.02$                          | $\pm 3.88$     | $\pm 24.56$    | $\pm 2.85$    | $\pm 0.89$ |

Note: Values are the means  $\pm$  standard error (SE; n = 3). TN, total nitrogen;  $\text{NH}_4^+\text{-N}$ , ammonium;  $\text{NO}_3^-\text{-N}$ , nitrate;  $\text{NO}_2^-\text{-N}$ , nitrite; DIN, dissolved inorganic nitrogen; DON, dissolved organic nitrogen; TOC, total organic carbon; and C/N, ratio of total organic carbon to total nitrogen.
